# Supplementary material for: Theoretical investigation on the balance between large band gap and strong SHG response in BMO4(M = P and As) crystals
Source: Royal Society of Chemistry journal article supplement (doi:10.1039/c6ra26568e), 2017-01-01

## Theoretical investigation on balance between large band gap and strong SHG response in $BMO_4$ ( $M=P, As$ ) crystals

Yanzhou Sun,<sup>a</sup> Zhihua Yang,<sup>\*a</sup> Dianwei Hou,<sup>a</sup> Shilie Pan<sup>a</sup>

<sup>a</sup>Key Laboratory of Functional Materials and Devices for Special Environments of CAS, Xinjiang Key Laboratory of Electronic Information Materials and Devices, Xinjiang Technical Institute of physics & Chemistry of CAS, 40-1 South Beijing Road, Urumqi 830011, China.

Fig.1s SHG-density of  $BPO_4$ : (a) VE occupied states; (b) VE unoccupied states; (c) VH occupied states; (d) VH unoccupied states.

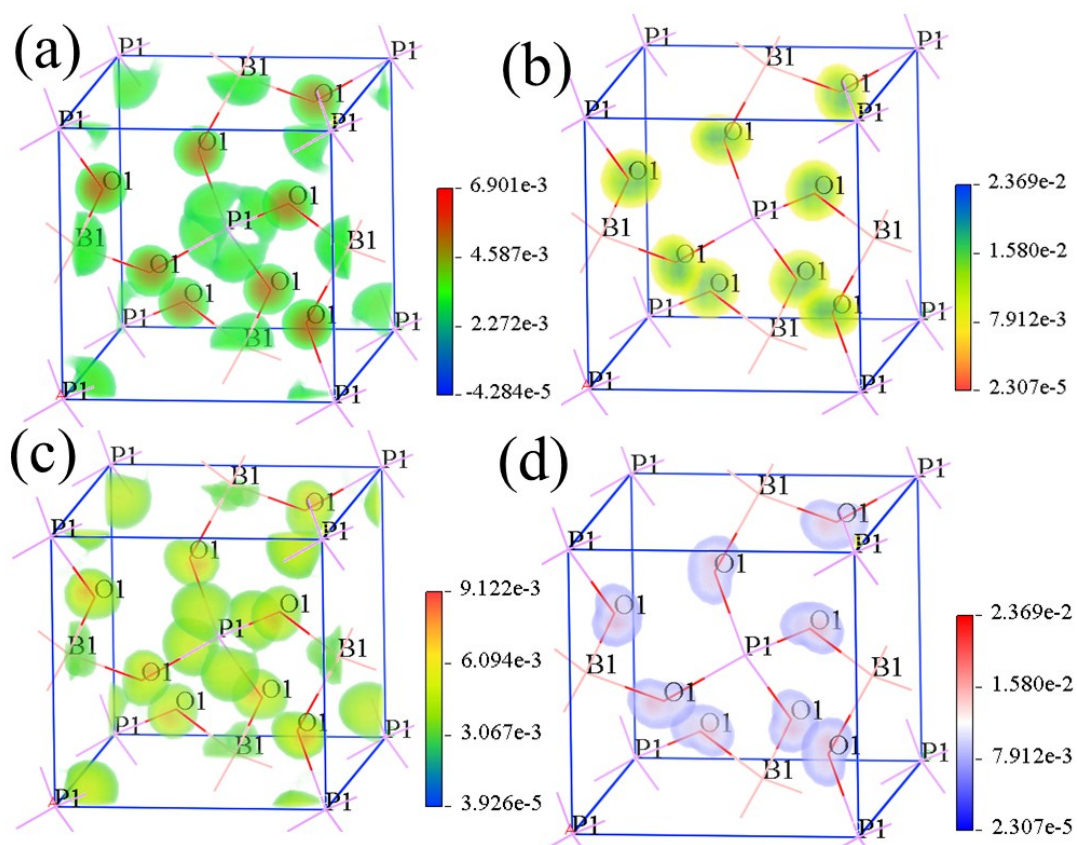

Supplement: c6ra26568e1.pdf [file c6ra26568e1.pdf]
